# Supplementary material for: Impact of the COVID-19 Pandemic on Influenza Hospital Admissions and Deaths in Wales: Descriptive National Time Series Analysis
Source: PubMed Central journal article supplement (PMC11358661; doi:10.2196/43173), 2024-08-21
Supplement: publichealth-v10-e43173-s001.pdf [file publichealth-v10-e43173-s001.pdf]

# Multimedia Appendix 1: Code set

## ICD-10 codes for influenza and influenza-related illness

| Group                                          | ICD-10 code                           | Description                                                                          |
|------------------------------------------------|---------------------------------------|--------------------------------------------------------------------------------------|
| Influenza codes                                |                                       |                                                                                      |
| Influenza                                      | J09                                   | Influenza due to identified zoonotic or pandemic influenza virus                     |
|                                                | J10                                   | Influenza due to identified seasonal influenza virus                                 |
|                                                | J10.0                                 | Influenza with pneumonia, seasonal influenza virus identified                        |
|                                                | J10.1                                 | Influenza with other respiratory manifestations, seasonal influenza virus identified |
|                                                | J10.8                                 | Influenza with other manifestations, seasonal influenza virus identified             |
|                                                | J11                                   | Influenza, virus not identified                                                      |
|                                                | J11.0                                 | Influenza with pneumonia, virus not identified                                       |
|                                                | J11.1                                 | Influenza with other respiratory manifestations, virus not identified                |
|                                                | J11.8                                 | Influenza with other manifestations, virus not identified                            |
| Influenza-related illness codes                |                                       |                                                                                      |
| Other pneumonia                                | J12                                   | Viral pneumonia, not elsewhere classified                                            |
|                                                | J12.0                                 | Adenoviral pneumonia                                                                 |
|                                                | J12.1                                 | Respiratory syncytial virus pneumonia                                                |
|                                                | J12.2                                 | Parainfluenza virus pneumonia                                                        |
|                                                | J12.3                                 | Human metapneumovirus pneumonia                                                      |
|                                                | J12.8                                 | Other viral pneumonia                                                                |
|                                                | J12.9                                 | Viral pneumonia, unspecified                                                         |
|                                                | J13                                   | Pneumonia due to Streptococcus pneumoniae                                            |
|                                                | J14                                   | Pneumonia due to Haemophilus influenzae                                              |
|                                                | J15                                   | Bacterial pneumonia, not elsewhere classified                                        |
|                                                | J15.0                                 | Pneumonia due to Klebsiella pneumoniae                                               |
|                                                | J15.1                                 | Pneumonia due to Pseudomonas                                                         |
|                                                | J15.2                                 | Pneumonia due to staphylococcus                                                      |
|                                                | J15.3                                 | Pneumonia due to streptococcus, group B                                              |
|                                                | J15.4                                 | Pneumonia due to other streptococci                                                  |
|                                                | J15.5                                 | Pneumonia due to Escherichia coli                                                    |
|                                                | J15.6                                 | Pneumonia due to other Gram-negative bacteria                                        |
|                                                | J15.7                                 | Pneumonia due to Mycoplasma pneumoniae                                               |
|                                                | J15.8                                 | Other bacterial pneumonia                                                            |
|                                                | J15.9                                 | Bacterial pneumonia, unspecified                                                     |
|                                                | J16                                   | Pneumonia due to other infectious organisms, not elsewhere classified                |
|                                                | J16.0                                 | Chlamydial pneumonia                                                                 |
|                                                | J16.8                                 | Pneumonia due to other specified infectious organisms                                |
|                                                | J17                                   | Pneumonia in diseases classified elsewhere                                           |
|                                                | J17.0                                 | Pneumonia in bacterial diseases classified elsewhere                                 |
|                                                | J17.1                                 | Pneumonia in viral diseases classified elsewhere                                     |
|                                                | J17.2                                 | Pneumonia in mycoses                                                                 |
|                                                | J17.3                                 | Pneumonia in parasitic diseases                                                      |
|                                                | J17.8                                 | Pneumonia in other diseases classified elsewhere                                     |
|                                                | J18                                   | Pneumonia, organism unspecified                                                      |
|                                                | J18.0                                 | Bronchopneumonia, unspecified                                                        |
|                                                | J18.1                                 | Lobar pneumonia, unspecified                                                         |
|                                                | J18.2                                 | Hypostatic pneumonia, unspecified                                                    |
| J18.8                                          | Other pneumonia, organism unspecified |                                                                                      |
| J18.9                                          | Pneumonia, unspecified                |                                                                                      |
| Other Lower Respiratory Tract Infection (LRTI) | J20                                   | Acute bronchitis                                                                     |
|                                                | J20.0                                 | Acute bronchitis due to Mycoplasma pneumoniae                                        |
|                                                | J20.1                                 | Acute bronchitis due to Haemophilus influenzae                                       |
|                                                | J20.2                                 | Acute bronchitis due to streptococcus                                                |

|                                                                               |       |                                                                                    |
|-------------------------------------------------------------------------------|-------|------------------------------------------------------------------------------------|
|                                                                               | J20.3 | Acute bronchitis due to coxsackievirus                                             |
|                                                                               | J20.4 | Acute bronchitis due to parainfluenza virus                                        |
|                                                                               | J20.5 | Acute bronchitis due to respiratory syncytial virus                                |
|                                                                               | J20.6 | Acute bronchitis due to rhinovirus                                                 |
|                                                                               | J20.7 | Acute bronchitis due to echovirus                                                  |
|                                                                               | J20.8 | Acute bronchitis due to other specified organisms                                  |
|                                                                               | J20.9 | Acute bronchitis, unspecified                                                      |
|                                                                               | J21   | Acute bronchiolitis                                                                |
|                                                                               | J21.0 | Acute bronchiolitis due to respiratory syncytial virus                             |
|                                                                               | J21.1 | Acute bronchiolitis due to human metapneumovirus                                   |
|                                                                               | J21.8 | Acute bronchiolitis due to other specified organisms                               |
|                                                                               | J21.9 | Acute bronchiolitis, unspecified                                                   |
|                                                                               | J22   | Unspecified acute lower respiratory infection                                      |
| Chronic lower respiratory diseases (bronchitis, COPD, asthma, bronchiectasis) | J40   | Bronchitis, not specified as acute or chronic                                      |
|                                                                               | J41   | Simple and mucopurulent chronic bronchitis                                         |
|                                                                               | J41.0 | Simple chronic bronchitis                                                          |
|                                                                               | J41.1 | Mucopurulent chronic bronchitis                                                    |
|                                                                               | J41.8 | Mixed simple and mucopurulent chronic bronchitis                                   |
|                                                                               | J42   | Unspecified chronic bronchitis                                                     |
|                                                                               | J43   | Emphysema                                                                          |
|                                                                               | J43.0 | MacLeod syndrome                                                                   |
|                                                                               | J43.1 | Panlobular emphysema                                                               |
|                                                                               | J43.2 | Centrilobular emphysema                                                            |
|                                                                               | J43.8 | Other emphysema                                                                    |
|                                                                               | J43.9 | Emphysema, unspecified                                                             |
|                                                                               | J44   | Other chronic obstructive pulmonary disease                                        |
|                                                                               | J44.0 | Chronic obstructive pulmonary disease with acute lower respiratory infection       |
|                                                                               | J44.1 | Chronic obstructive pulmonary disease with acute exacerbation, unspecified         |
|                                                                               | J44.8 | Other specified chronic obstructive pulmonary disease                              |
|                                                                               | J44.9 | Chronic obstructive pulmonary disease, unspecified                                 |
|                                                                               | J45   | Asthma                                                                             |
|                                                                               | J45.0 | Predominantly allergic asthma                                                      |
|                                                                               | J45.1 | Nonallergic asthma                                                                 |
|                                                                               | J45.8 | Mixed asthma                                                                       |
|                                                                               | J45.9 | Asthma, unspecified                                                                |
|                                                                               | J46   | Status asthmaticus                                                                 |
|                                                                               | J47   | Bronchiectasis                                                                     |
| Viral infection                                                               | B34.9 | Viral infection, unspecified                                                       |
| Respiratory/ chest symptoms                                                   | R05   | Cough                                                                              |
|                                                                               | R06.0 | Dyspnoea                                                                           |
|                                                                               | R07   | Pain in throat and chest                                                           |
|                                                                               | R06.8 | Other and unspecified abnormalities of breathing                                   |
|                                                                               | R07.0 | Pain in throat                                                                     |
|                                                                               | R07.1 | Chest pain on breathing                                                            |
|                                                                               | R07.2 | Precordial pain                                                                    |
|                                                                               | R07.3 | Other chest pain                                                                   |
|                                                                               | R07.4 | Chest pain, unspecified                                                            |
|                                                                               | R13   | Dysphagia                                                                          |
| Generalised symptoms                                                          | R50.9 | Fever, unspecified                                                                 |
|                                                                               | R51   | Headache                                                                           |
|                                                                               | M79.1 | Myalgia                                                                            |
|                                                                               | R53   | Malaise and fatigue                                                                |
|                                                                               | F05   | Infective delirium                                                                 |
| Systemic Inflammatory Response Syndrome (SIRS)                                | R65.0 | Systemic Inflammatory Response Syndrome of infectious origin without organ failure |
|                                                                               | R65.1 | Systemic Inflammatory Response Syndrome of infectious origin with organ failure    |
| Other                                                                         | A08.4 | Viral intestinal infection, unspecified                                            |
